# Supplementary material
Source: MDPI journal article supplement (https://www.mdpi.com/2073-4441/16/10/1417)
Supplement: s1 [file s1 › water-2974785-supplementary.pdf]

**Table S1.** Analyze items and test methods.

| Index                           | Analytical method                                                    |
|---------------------------------|----------------------------------------------------------------------|
| COD                             | K <sub>2</sub> Cr <sub>2</sub> O <sub>7</sub> -UV Photometric Method |
| NH <sub>4</sub> <sup>+</sup> -N | Nessler's reagent spectrophotometry                                  |
| NO <sub>3</sub> <sup>-</sup> -N | Salicylic acid spectrophotometry                                     |
| NO <sub>2</sub> <sup>-</sup> -N | Alpha-naphthylamine hydrochloride spectrophotometry                  |

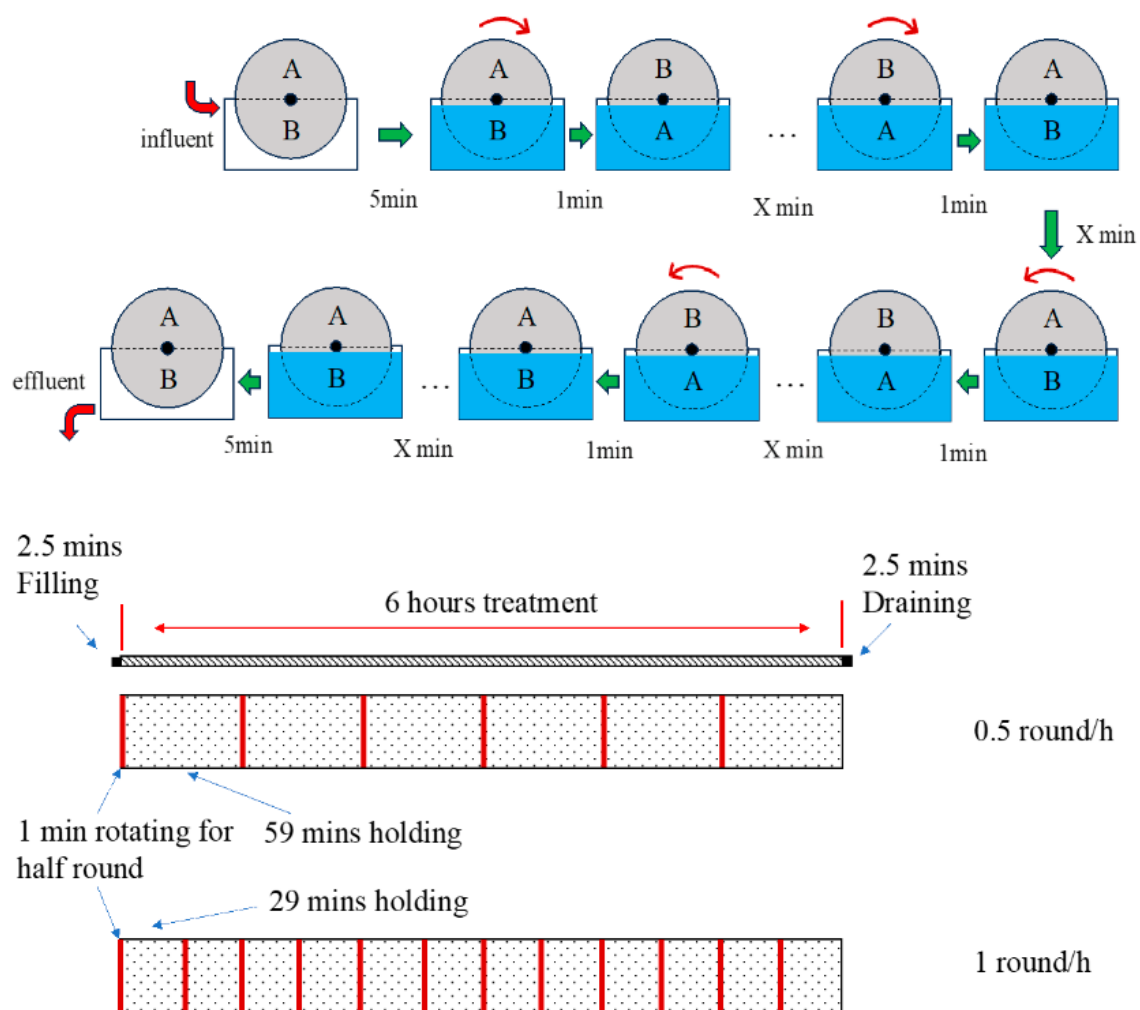

**Figure S1.** Illustration of rotation pattern of P-RBC reactor at rotating speed of 0.5 and 1 round per hour

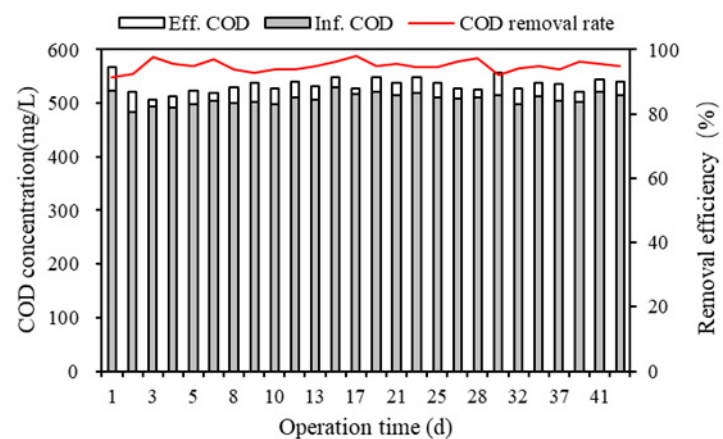

**Figure S2.** Long-term performance of COD removal by T-RBC

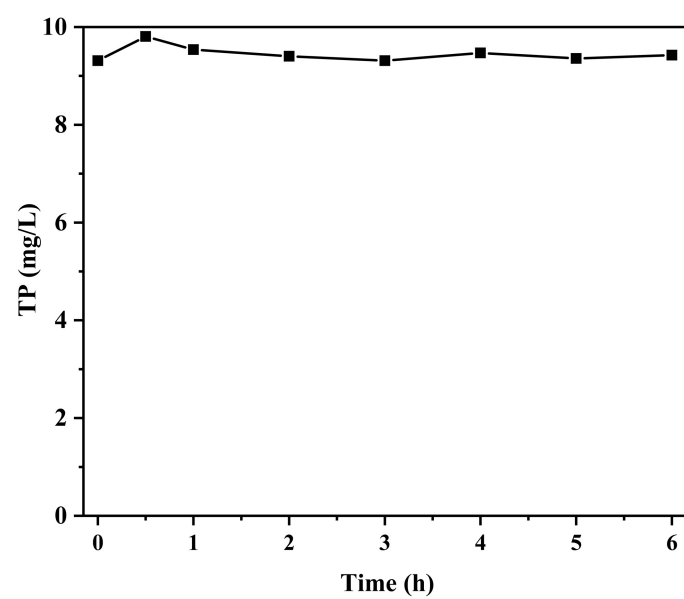

**Figure S3.** Total Phosphorous release profile

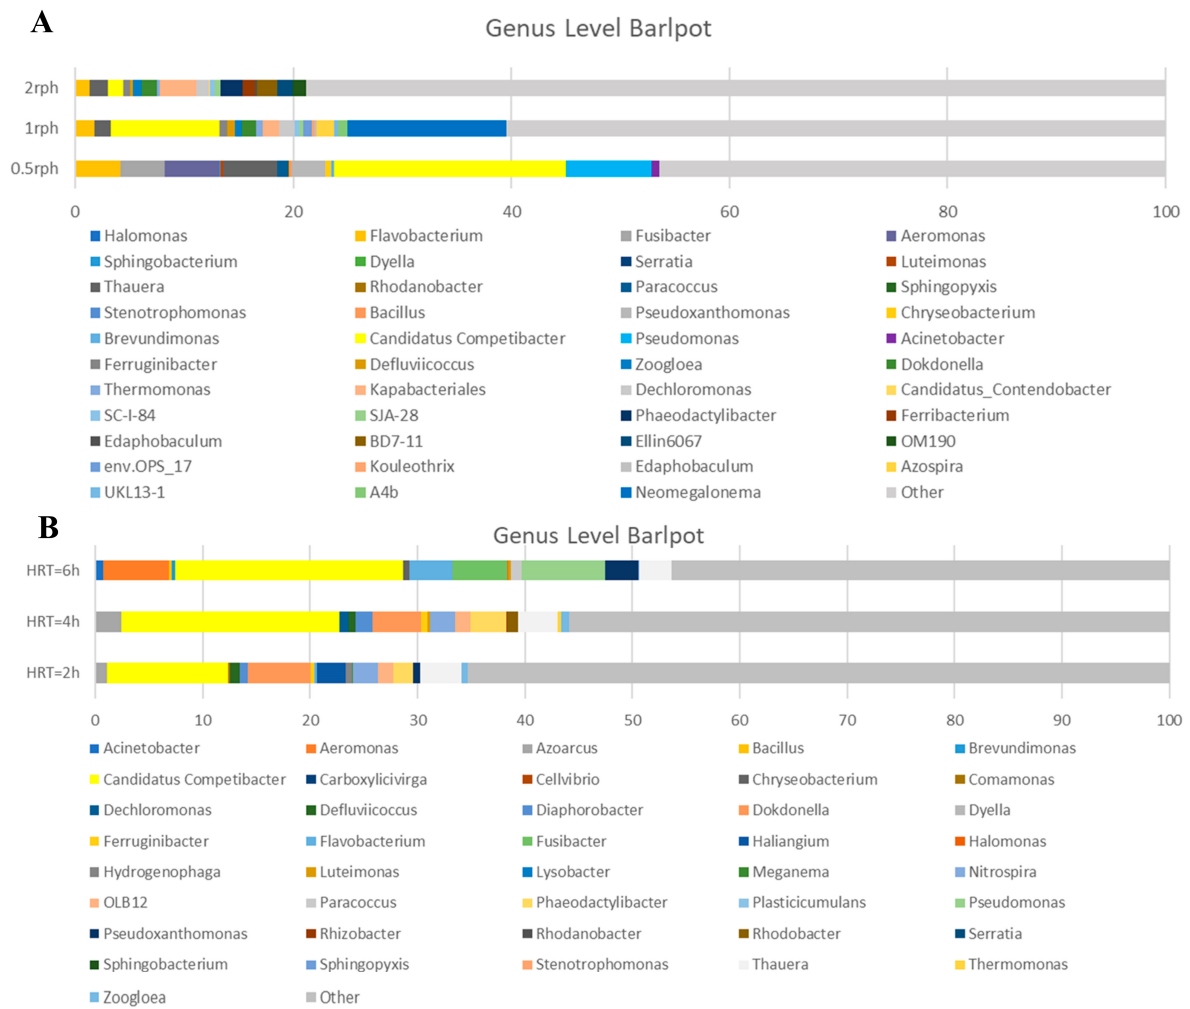

**Figure S4.** Microbial communities Analysis at A) different speeds; B) different HRTs

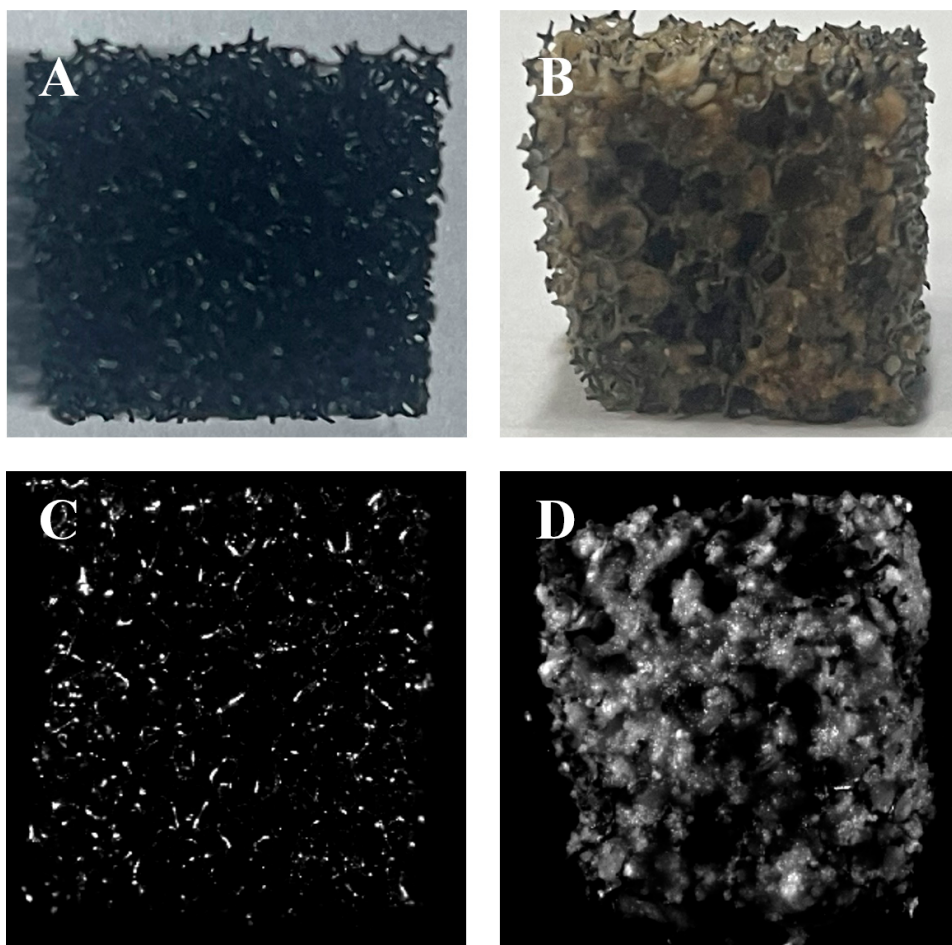

**Figure S5.** Camera photos of the A) Blank polyurethane biocarriers and the B) biofilm loaded biocarriers, compared to Gel electrophoresis imaging for the C) Blank polyurethane biocarriers and the D) biofilm loaded biocarriers

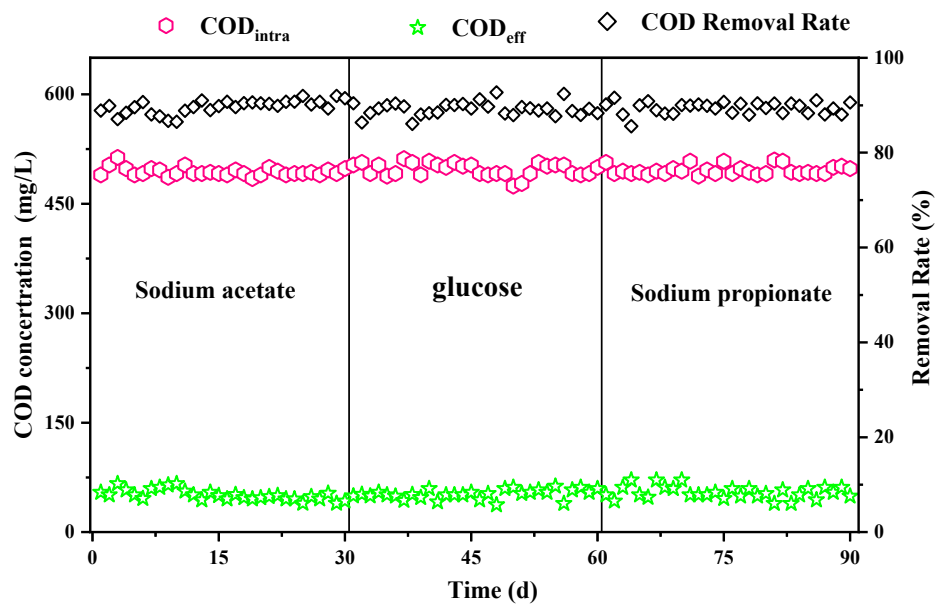

**Figure S6.** The COD of different carbon sources removes the long-term operation curve
